# Supplementary material
Source: ML conference proceedings conference paper supplement (https://proceedings.neurips.cc/paper_files/paper/2012/hash/5c936263f3428a40227908d5a3847c0b-Abstract.html)
Supplement: Supplementary file [file 5c936263f3428a40227908d5a3847c0b-Supplemental.zip]

## Proof of convergence

Under the assumption that the drift  $a(\cdot)$  is Lipschitz, we will show that the approximation

$$\mathbf{X}_t = \mathbf{X}_t^{\text{NL}} + \mathbf{X}_t^L \quad (1)$$

converges to the solution of the SDE

$$d\mathbf{X}_t = a(\mathbf{X}_t)dt + Bd\mathbf{W}_t \quad (2)$$

in  $L^2([0, T] \times \Omega)$ . We can apply Parseval's theorem to equation (14) in our paper to see that  $\mathbf{X}^L$  tends to 0 in  $L^2$ . It remains to show that  $\mathbf{X}^{\text{NL}}$  converges to  $\mathbf{X}$  in  $L^2$ . Our strategy will be to exploit the Lipschitz assumption so that we can bound the error using Gronwall's lemma.

Suppose  $\mathbf{X}_0 = \mathbf{X}^{\text{NL}} = x_0$ . For each  $t$  in  $[0, T]$ ,

$$\begin{aligned} \mathbf{X}_t - \mathbf{X}_t^{\text{NL}} &= \int_0^t (a(\mathbf{X}_u) - a(\mathbf{X}_u^{\text{NL}})) du + B \left( \mathbf{W}_t - \sum_{i=1}^N \mathbf{Z}_i \int_0^t \phi_i(u) du \right) \\ &= \int_0^t (a(\mathbf{X}_u) - a(\mathbf{X}_u^{\text{NL}})) du + B\mathbf{R}_t^{(N)}. \end{aligned} \quad (3)$$

Since  $\|a + b\|^2 \leq 2\|a\|^2 + 2\|b\|^2$ , we have

$$\mathbb{E} [\|\mathbf{X}_t - \mathbf{X}_t^{\text{NL}}\|^2] \leq 2\mathbb{E} \left[ \left\| \int_0^t (a(\mathbf{X}_u) - a(\mathbf{X}_u^{\text{NL}})) du \right\|^2 \right] + 2\mathbb{E} [\|\mathbf{R}_t^{(N)}\|^2]. \quad (4)$$

The Cauchy-Schwarz inequality tells us

$$\mathbb{E} \left[ \left\| \int_0^t (a(\mathbf{X}_u) - a(\mathbf{X}_u^{\text{NL}})) du \right\|^2 \right] \leq t \int_0^t \mathbb{E} [\|a(\mathbf{X}_u) - a(\mathbf{X}_u^{\text{NL}})\|^2] du. \quad (5)$$

Thus, by the Lipschitz assumption, there exists  $L > 0$  such that

$$\mathbb{E} \left[ \left\| \int_0^t (a(\mathbf{X}_u) - a(\mathbf{X}_u^{\text{NL}})) du \right\|^2 \right] \leq tL^2 \int_0^t \mathbb{E} [\|\mathbf{X}_u - \mathbf{X}_u^{\text{NL}}\|^2] du. \quad (6)$$

Set

$$C^N(t) = 2E[\|\mathbf{R}_t^{(N)}\|^2] \quad (7)$$

$$\psi(t) = E[\|\mathbf{X}_t - \mathbf{X}_t^{\text{NL}}\|^2] \quad (8)$$

Combining (6) with (4), we see that

$$\psi(t) \leq 2TL^2 \int_0^t \psi(u) du + C^N(t) \quad (9)$$

By Gronwall's inequality,

$$\psi(t) \leq C^N(t) + 2TL^2 \exp(2T^2L^2) \int_0^t C^N(u) du \quad (10)$$

Since  $C^N$  is non-negative,

$$\psi(t) \leq C^N(t) + k \int_0^T C^N(u) du \quad (11)$$

for an appropriate constant  $k$ . We integrate both sides over  $[0, T]$ :

$$\int_0^T \psi(u) du \leq \int_0^T C^N(u) du + kT \int_0^T C^N(u) du. \quad (12)$$

We can apply the dominated convergence theorem to show that

$$\int_0^T C^N(u) du = 2 \int_0^T E[\|\mathbf{R}_u^{(N)}\|^2] du \rightarrow 0. \quad (13)$$

We conclude that

$$\int_0^T \psi(u) du = \int_0^T E[\|\mathbf{X}_u - \mathbf{X}_u^{\text{NL}}\|^2] du \rightarrow 0. \quad (14)$$

That is,  $\hat{\mathbf{X}} \rightarrow \mathbf{X}$  in  $L^2$ .
